# Supplementary material for: Using Bayesian Networks to Explore Risk Factors for Sports Injuries in Chinese Adult Women Who Exercise Regularly: A Nationwide Study
Source: Research Square preprint supplement (doi:10.21203/rs.3.rs-7081577/v1), 2025-08-19
Supplement: Supplementary file 1 [file 302d0f481ea92e1766b855c2.docx]

**Research on the current status of sports injuries Electronic electronic edition 1**

Hello, this questionnaire was designed by a team of experts from Beijing Sport University.Thank you very much for providing sports-related data, which will be used as an important basis for the construction of sports injury risk assessment model, please fill in the questionnaire according to your own actual situation.The data will only be used for the purpose of scientific research, and we will keep the results of the questionnaire strictly confidential.Thank you for your participation.

1.Age [fill in the blank] ______________________________

2.Gender [Select one answer choice]*

○ Male ○ Female

3.Height (cm) [fill in the blank]______________________________

4.Weight (kg) [fill in the blank]______________________________

5. Are you in the habit of exercising regularly (regular exercise means: exercising at least 3 times a week for at least 30 minutes each time for at least 3 months or more) [Single choice]

○ Yes ○ No

6.If you are a regular runner, what is your habit of landing on your feet when you run?[Select one answer choice]*

○ Forefoot strike ○ Heel strike ○ Midfoot strike ○ Not paying attention

7.Have you ever experienced a sports injury [Select one answer choice]* (Sports injuries are all kinds of injuries that occur during sports, and their injury sites are related to the sports and specialised technical characteristics)

○Yes ○No (Please skip to Question 37)

8.The sport you were playing at the time of your sports injury was:( ) [Select one answer choice]*

○A. Walking ○B. Running ○C. Cycling

○D. Swimming ○E. Football ○F. Basketball

○G. Badminton ○H. Tennis ○I. Table Tennis

○J.Square Dance ○K.Others _________________

9. The specific part of the body that was injured at the time was: [Select one answer choice]*.

○.A. Shoulder and upper extremity ○B. Low back ○C. Knee ○D. Ankle

○E. Other _______

10. Which of the following types of sports injuries did you suffer at the time ?( )[Select one answer choice]*

○A. Joint sprain ○B. Muscle strain ○C. Tendon strain ○D. Fracture

○E. Other_________

11. Whether the sports injury you suffered occurred in daily sports or in an official competition? ( ) [Select one answer choice]*

○A. Ordinary exercise ○B. Competition

12. Your environmental conditions at the time of your sports injury ( ) [Select one answer choice]*

○A. Indoor ○B. Outdoor

13. What type of field surface conditions did you exercise on at the time of your sports injury ( ) [Select one answer choice]*

○A. Marble floor ○B. Wooden floor ○C. Plastic floor ○D. Concrete ground

○E. Professional running track ○F. Earthy ground ○G. Others

1. Please briefly describe what you were doing at the time of the injury (20 words or less).

______________________________________________________________________________________

15.The season you were in when you had your sports injury was ( ) [Select one answer choice]*

○A. Spring ○B. Summer ○C. Autumn ○D. Winter

16. Which time slot of day were you at the time of your sports injury? [Select one answer choice]*

○A. Early morning ○ B. Morning ○ C. Afternoon ○D. Evening ○ E. No regularity

17.The sport you participated in most often before your sports injury was: [Select one answer choice]*

○A. Walking ○B. Running ○C. Cycling ○D. Swimming ○E. Soccer

○F. Basketball ○G. Badminton ○H. Tennis ○I. Table tennis ○J. Square dancing

○K. Other sports please fill in the form

18.The most customary time slot of day for you to exercise prior to your injury was: [Select one answer choice]*

○A. Morning ○B. Afternoon ○C. Evening ○D. Early morning ○E. No regularity

19.Whether you learnt the movements of the specific sport you play regularly from a professional coach before the sports injury?() [Select one answer choice]*

○A. Yes ○B. No

20.Were you regularly doing strength training, e.g. deep squat, bench press, etc., before you had your sports injury ( ) [Select one answer choice]*

○A. Yes ○B. No (Please skip to Question 23)

21.What form of strength training did you perform most often before you had a sports injury (Apparatus exercises are stationary strength exercise machines such as Smith racks; free weights are weighted barbells or dumbbells, not anchored by specialised machines; own body weight is exercises against your own weight such as sit-ups and pull-ups. )[Select one answer choice]*

○A. Apparatus exercises (on a rack with stationary training)

○B. Free weights (equipment is not stationary)

○C. Self-weight (no extra weights, but your own body weight)

○D. No strength training

22.Did you have professional instruction during strength training prior to your injury? ( )[Select one answer choice]*

○A. Always ○B.Often ○C. Sometims ○D. Occasionally ○E. Never

23.Have you ever warmed up before each exercise session before the sport injury occurred? ( )[Select one answer choice]*

○A. Always ○B. Often ○C. Sometims ○D. Occasionally ○E. Never

24.Have you ever relaxed after each exercise session before the sport injury occurred? ( )[Select one answer choice]*

○A. Always ○B. Often ○C. Sometims ○D. Occasionally ○E. Never

25.Did you wear specific sports shoes for that sport when you exercised before the sports injury occurred? ( ) [Select one answer choice]*

○A. Always ○B. Often ○C. Sometimes ○D. Occasionally ○E. Never

26.What type of field surface conditions did you regularly exercise on before you sustained your sports injury?( )[Select one answer choice]*

○A. Marble floor ○B. Wooden floor ○C. Plastic floor ○D. Concrete ground

○E. Professional running track ○F. Earthy ground ○G. Others_______________

27.Until the time of your injury, how long had you been in the habit of regular exercise? (regular exercise is defined as exercise lasting at least 30 minutes, at least 3 times a week, for a period of up to 3 months)( ) [Select one answer choice]*

○Less than 1 year ○1 year-3 years ○4 years-9 years ○More than 10 years

○Don't remember

28.Did you feel a lack of energy to do things in the month before your sports injury?( )[Select one answer choice]*

○A. Often ○B. Sometims ○C. Occasionally ○D. Never

29.Did you feel fatigued or sick in the month before your sports injury?()[Select one answer choice]*

○ A. Yes ○ B. No ○C. Not sure

30.How well did you sleep in the month before your sports injury?[Select one answer choice]*

○A. Very poor ○B. Poor ○C. Okay ○D. Better ○E. Very good

31.Whether you have had multiple recurrences of the same injury in the same area? ( ) [Select one answer choice]*

○A. Yes ○B. No

32.Whether you performed emergency treatment of the injury at the time of the first injury? (e.g. ice, braking, compression bandages, elevation of the injured limb, etc.)( )[Select one answer choice]*

○A. Yes ○B. No

33.Whether you still have pain in the area where you sustained the sports injury? ( )[Select one answer choice]*

○A. Yes ○B. No

34.Whether you undertook specialised sports rehabilitation after your first sports injury?( )[Select one answer choice]*

○A. Yes ○B. No

35.Do you have a habit of wearing a brace or support belt for exercise after you have sustained your sports injury?( )[Select one answer choice]*

○A. Often ○B. Sometimes ○C. Occasionally ○D. Never

36.Were you aware that sports carry a risk of injury before your sports injury occurred? ( )[Select one answer choice]*

○A. Fully understand ○B.Some ○C. A little ○D. None

37.The sport you usually participate in most often is:( )[Select one answer choice]*

○A. Walking ○B. Running ○C. Cycling ○D. Swimming ○E. Football

○F. Basketball ○G. Badminton ○H. Tennis ○I. Table tennis

38.How long have you been in the habit of regular exercise until now? ( )[Select one answer choice]*

○Less than 1 year ○1 year-3 years ○4 years-9 years ○More than 10 years

○Don't remember

39.Do you usually wear specific sports shoes for that sport when you exercise? ( )[Select one answer choice]*

○A. Always ○B. Often ○C. Sometimes ○D. Occasionally ○E. Never ○F. Not sure

40.What type of field surface conditions do you regularly exercise on? ( )[Select one answer choice]*

○A. Marble floor ○B. Wooden floor ○C. Plastic floor ○D. Concrete ground

○E. Professional running track ○F. Earthy ground ○G. Others_______________

41.Which time slot of day is your most habitual time for exercise?( )[Select one answer choice]*

○A. Morning ○B. Afternoon ○C. Evening ○D. Early morning ○E. No regularity

42.Whether you have learnt the movements of this sport you regularly play from a professional coach in your daily practice () [Select one answer choice]*

○A. Yes ○B. No

1. Whether you often do strength training, such as squatting, bench pressing, etc. () [Select one answer choice]**

○A. Yes ○B. No(Please skip to Question 46)

44.What form of strength training did you perform most often in your normal exersice?( )(Apparatus exercises are stationary strength exercise machines such as Smith racks; free weights are weighted barbells or dumbbells, not anchored by specialised machines; own body weight is exercises against your own weight such as sit-ups and pull-ups. )[Select one answer choice]*

○A. Apparatus exercises (on a rack with stationary training)

○B. Free weights (equipment is not stationary)

○C. Self-weight (no extra weights, but your own body weight)

○D. No strength training

45.During your strength training ,have you ever haven any professional coaching? ( )[Select one answer choice]*

○A. Always ○B. Often ○C. Sometims ○D. Occasionally ○E. Never

46.Have you ever warmed up before performing each of your exercise workouts?()[Select one answer choice]*

○A. Always ○B. Often ○C. Sometims ○D. Occasionally ○E. Never

47.Have you ever done a relaxation session after each of your sports exercises?()[Select one answer choice]*

○A. Always ○B. Often ○C. Sometims ○D. Occasionally ○E. Never

48.Whether you felt always tired or were getting sick before each of your exercises?()[Select one answer choice]*

○ A. Yes ○ B. No ○C. Not sure

49.Have you felt a lack of energy to do things in the last month?()[Select one answer choice]*

○A. Often ○B. Sometims ○C. Occasionally ○D. Never

50.How well have you slept in the last month?()[Select one answer choice]*

○A. Very poor ○B. Poor ○C. Okay ○D. Better ○E. Very good

51.Are you aware that exercise carries a risk of injury?()[Select one answer choice]*

○A. Fully understand ○B.Some ○C. A little ○D. None
